# Supplementary material for: Evaluating the Machine Learning Literature: A Primer and User’s Guide for Psychiatrists
Source: Atypon-hosted journal article supplement (doi:10.1176/appi.ajp.2020.20030250), 2021-06-03
Supplement: appi.ajp.2020.20030250.ds001.pdf [file appi.ajp.2020.20030250.ds001.pdf]

 


Psychiatry Online
