# Supplementary material for: Evaluating the Machine Learning Literature: A Primer and User’s Guide for Psychiatrists
Source: Atypon-hosted journal article supplement (doi:10.1176/appi.ajp.2020.20030250), 2021-06-03
Supplement: appi.ajp.2020.20030250.ds001.pdf [file appi.ajp.2020.20030250.ds001.pdf]

## **Recommended reading**

### **Big data**

Gillan CM, Whelan R. What big data can do for treatment in psychiatry. *Current Opinion in Behavioral Sciences*. 2017;18:34-42.

Rutledge RB, Chekroud AM, Huys QJM. Machine learning and big data in psychiatry: toward clinical applications. *Current Opinion in Neurobiology*. 2019;55:152-159.

Simon GE. Big Data From Health Records in Mental Health Care: Hardly Clairvoyant but Already Useful. *JAMA Psychiatry*. 2019;76:349-350.

Tai AMY, Albuquerque A, Carmona NE, Subramaniepillai M, Cha DS, Sheko M, Lee Y, Mansur R, McIntyre RS. Machine learning and big data: Implications for disease modeling and therapeutic discovery in psychiatry. *Artificial Intelligence in Medicine*. 2019;99:101704.

### **Machine learning**

Bzdok D, Meyer-Lindenberg A. Machine Learning for Precision Psychiatry: Opportunities and Challenges. *Biological Psychiatry: Cognitive Neuroscience and Neuroimaging*. 2018;3:223-230.

Durstewitz D, Koppe G, Meyer-Lindenberg A. Deep neural networks in psychiatry. *Molecular Psychiatry*. 2019;24:1583-1598.

Dwyer DB, Falkai P, Koutsouleris N. Machine Learning Approaches for Clinical Psychology and Psychiatry. *Annual Review of Clinical Psychology*. 2018;14:91-118.

Hastie T, Tibshirani R, Friedman JH: *The Elements of Statistical Learning: Data Mining, Inference, and Prediction*, Springer; 2009.

Iniesta R, Stahl D, McGuffin P. Machine learning, statistical learning and the future of biological research in psychiatry. *Psychological Medicine*. 2016;46:2455-2465.

Kassraian-Fard P, Matthis C, Balsters JH, Maathuis MH, Wenderoth N. Promises, Pitfalls, and Basic Guidelines for Applying Machine Learning Classifiers to Psychiatric Imaging Data, with Autism as an Example. *Frontiers in Psychiatry*. 2016;7.

Khondoker M, Dobson R, Skirrow C, Simmons A, Stahl D. A comparison of machine learning methods for classification using simulation with multiple real data examples from mental health studies. *Statistical Methods in Medical Research*. 2013;25:1804-1823.

LeCun, Yann, Yoshua Bengio, and Geoffrey Hinton. "Deep learning." *Nature* 521.7553 (2015): 436-444.

Maia TV, Frank MJ. From reinforcement learning models to psychiatric and neurological disorders. *Nature Neuroscience*. 2011;14:154-162.

Oquendo MA, Baca-Garcia E, Artés-Rodríguez A, Perez-Cruz F, Galfalvy HC, Blasco-Fontecilla H, Madigan D, Duan N. Machine learning and data mining: strategies for hypothesis generation. *Molecular Psychiatry*. 2012;17:956-959.

Rajkomar, Alvin, Jeffrey Dean, and Isaac Kohane. "Machine learning in medicine." *New England Journal of Medicine* 380.14 (2019): 1347-1358.

Schnack HG. Improving individual predictions: Machine learning approaches for detecting and attacking heterogeneity in schizophrenia (and other psychiatric diseases). *Schizophrenia Research*. 2019;214:34-42.

Shatte ABR, Hutchinson DM, Teague SJ. Machine learning in mental health: a scoping review of methods and applications. *Psychological Medicine*. 2019;49:1426-1448.

Zhou Z, Wu T-C, Wang B, Wang H, Tu XM, Feng C. Machine learning methods in psychiatry: a brief introduction. *Gen Psychiatr*. 2020;33:e100171-e100171.

### **Natural Language Processing**

Abbe A, Grouin C, Zweigenbaum P, Falissard B. Text mining applications in psychiatry: a systematic literature review. *International Journal of Methods in Psychiatric Research*. 2016;25:86-100.

Kreimeyer K, Foster M, Pandey A, Arya N, Halford G, Jones SF, Forshee R, Walderhaug M, Botsis T. Natural language processing systems for capturing and standardizing unstructured clinical information: A systematic review. *Journal of Biomedical Informatics*. 2017;73:14-29.

Manning CD, Schütze H: *Foundations of statistical natural language processing*, MIT Press; 1999.

McCoy TH, Yu S, Hart KL, Castro VM, Brown HE, Rosenquist JN, Doyle AE, Vuijk PJ, Cai T, Perlis RH. High Throughput Phenotyping for Dimensional Psychopathology in Electronic Health Records. *Biol Psychiatry*. 2018;83:997-1004.

Perlis RH, Iosifescu DV, Castro VM, Murphy SN, Gainer VS, Minnier J, Cai T, Goryachev S, Zeng Q, Gallagher PJ, Fava M, Weilburg JB, Churchill SE, Kohane IS, Smoller JW. Using electronic medical records to enable large-scale studies in psychiatry: treatment resistant depression as a model. *Psychological medicine*. 2012;42:41-50.

Smoller JW. The use of electronic health records for psychiatric phenotyping and genomics. *American Journal of Medical Genetics Part B: Neuropsychiatric Genetics*. 2018;177:601-612.

Tran T, Kavuluru R. Predicting mental conditions based on "history of present illness" in psychiatric notes with deep neural networks. *Journal of Biomedical Informatics*. 2017;75:S138-S148.

Uzuner Ö, Stubbs A, Filannino M. A natural language processing challenge for clinical records: Research Domains Criteria (RDoC) for psychiatry. *Journal of biomedical informatics*. 2017;75S:S1-S3.

Weng W-H, Waghlikar KB, McCray AT, Szolovits P, Chueh HC. Medical subdomain classification of clinical notes using a machine learning-based natural language processing approach. *BMC Medical Informatics and Decision Making*. 2017;17:155.
